# Supplementary material
Source: ML conference proceedings conference paper supplement (https://openreview.net/forum?id=plu6AK3qs5T)
Supplement: supplementary_material [file attachment]

547 **A Proof of differential privacy**

548 *Proof of Theorem 3.* Define the  $\ell_2$  **sensitivity** of any function  $g$  to be  $\Delta g = \sup_{S, S'} \|g(S) - g(S')\|_2$   
 549 where the supreme is over all neighboring  $(S, S')$ . Then the **Gaussian mechanism**  $\hat{g}(S) = g(S) +$   
 550  $\sigma \Delta g \cdot \mathcal{N}(0, \mathbf{I})$ .

551  $\sigma$  denotes the ‘‘Noise multiplier’’, which corresponds to the noise-level when a Gaussian mechanism  
 552 is applied to a query with sensitivity 1.

553 Observe that automatic clipping (AUTO-V and AUTO-S (4.1)) ensures the bounded global-sensitivity  
 554 of the stochastic gradient as in Abadi’s clipping. Aligning the noise-multiplier (rather than the  
 555 noise-level itself) ensures that the the noise-to-sensitivity ratio  $\frac{\sigma \Delta g}{\Delta g} = \sigma$  is fixed regardless of  $\Delta g$ .  
 556 The Gaussian mechanism’s privacy guarantees are equivalent. Thus from the privacy accountant  
 557 perspective, DP-SGD with both Abadi’s clipping and our autoclipping method can be equivalently  
 558 represented as the adaptive composition of  $T$  Poisson sampled Gaussian Mechanism with sampling  
 559 probability  $B/n$  and noise multiplier  $\sigma$ .  $\square$

560 **B Proof of automaticity**

561 **B.1 Non-adaptive DP optimizers**

562 *Proof of Theorem 1.* We prove Theorem 1 by showing that, DP-SGD using  $R$ -dependent AUTO-S  
 563 with learning rate  $\eta$  and weight decay  $\lambda$  is equivalent to  $R$ -independent AUTO-S with learning rate  
 564  $\eta R$  and weight decay  $\lambda/R$ . We claim other non-adaptive optimizers such as HeavyBall and NAG can  
 565 be easily shown in a similar manner.

Recall the standard SGD with weight decay is

$$\mathbf{w}_{t+1} = \mathbf{w}_t - \eta \left( \sum_{i \in B_t} \frac{\partial l_i}{\partial \mathbf{w}_t} + \lambda \mathbf{w}_t \right)$$

566 Replacing the standard gradient  $\sum_i \frac{\partial l_i}{\partial \mathbf{w}_t}$  with the private gradient, we write the  $R$ -dependent case as

$$\begin{aligned} \mathbf{w}_{t+1} &= \mathbf{w}_t - \eta \left( \sum_{i \in B_t} \frac{\partial l_i}{\partial \mathbf{w}_t} \cdot R / \left\| \frac{\partial l_i}{\partial \mathbf{w}_t} \right\|_2 + \sigma R \cdot \mathcal{N}(0, \mathbf{I}) + \lambda \mathbf{w}_t \right) \\ &= \mathbf{w}_t - \eta R \left( \sum_{i \in B_t} \frac{\partial l_i}{\partial \mathbf{w}_t} / \left\| \frac{\partial l_i}{\partial \mathbf{w}_t} \right\|_2 + \sigma \cdot \mathcal{N}(0, \mathbf{I}) \right) - \eta \lambda \mathbf{w}_t \end{aligned}$$

567 which is clearly equivalent to the  $R$ -independent case:

$$\mathbf{w}_{t+1} = \mathbf{w}_t - \eta' \left( \sum_{i \in B_t} \frac{\partial l_i}{\partial \mathbf{w}_t} / \left\| \frac{\partial l_i}{\partial \mathbf{w}_t} \right\|_2 + \sigma \cdot \mathcal{N}(0, \mathbf{I}) + \lambda' \mathbf{w}_t \right)$$

568 if we use  $\eta' = \eta R$  and  $\lambda' = \lambda/R$ .  $\square$

569 **B.2 Adaptive DP optimizers**

570 *Proof of Theorem 2.* We prove Theorem 2 by showing that, DP-AdamW using  $R$ -dependent AUTO-S  
 571 with learning rate  $\eta$  and weight decay  $\lambda$  is equivalent to  $R$ -independent AUTO-S with the same  
 572 learning rate  $\eta$  and weight decay  $\lambda/R$ . This is the most complicated case. We claim other adaptive  
 573 optimizers such as AdaDelta, Adam with weight decay (not AdamW), and NAdam can be easily  
 574 shown in a similar manner.

Recall the standard AdamW is

$$\mathbf{w}_{t+1} = \mathbf{w}_t - \eta \left( \frac{\mathbf{m}_t / (1 - \beta_1)}{\sqrt{\mathbf{v}_t / (1 - \beta_2)}} + \lambda \mathbf{w}_t \right)$$

where  $\beta_1, \beta_2$  are constants,  $\mathbf{g}_t := \sum_i \frac{\partial l_i}{\partial \mathbf{w}_t}$  is the standard gradient,

$$\mathbf{m}_t = \beta_1 \mathbf{m}_{t-1} + (1 - \beta_1) \mathbf{g}_t \longrightarrow \mathbf{m}_t = \sum_{\tau} \beta_1^{t-\tau} (1 - \beta_1) \mathbf{g}_{\tau},$$

$$\mathbf{v}_t = \beta_2 \mathbf{v}_{t-1} + (1 - \beta_2) \mathbf{g}_t^2 \longrightarrow \mathbf{v}_t = \sum_{\tau} \beta_2^{t-\tau} (1 - \beta_2) \mathbf{g}_{\tau}^2.$$

Replacing the standard gradient with the private gradient  $R\tilde{\mathbf{g}}_t := R(\sum_i \frac{\partial l_i}{\partial \mathbf{w}_t} / \|\frac{\partial l_i}{\partial \mathbf{w}_t}\|_2 + \sigma \cdot \mathcal{N}(0, I))$ , we write the  $R$ -dependent DP-AdamW as

$$\mathbf{w}_{t+1} = \mathbf{w}_t - \eta \left( \frac{\tilde{\mathbf{m}}_t / (1 - \beta_1)}{\sqrt{\tilde{\mathbf{v}}_t / (1 - \beta_2)}} + \lambda \mathbf{w}_t \right)$$

where

$$\tilde{\mathbf{m}}_t = \beta_1 \tilde{\mathbf{m}}_{t-1} + (1 - \beta_1) R \tilde{\mathbf{g}}_t \longrightarrow \tilde{\mathbf{m}}_t = \sum_{\tau} \beta_1^{t-\tau} (1 - \beta_1) R \tilde{\mathbf{g}}_{\tau},$$

$$\tilde{\mathbf{v}}_t = \beta_2 \tilde{\mathbf{v}}_{t-1} + (1 - \beta_2) R^2 \tilde{\mathbf{g}}_t^2 \longrightarrow \tilde{\mathbf{v}}_t = \sum_{\tau} \beta_2^{t-\tau} (1 - \beta_2) R^2 \tilde{\mathbf{g}}_{\tau}^2.$$

575 Clearly, the  $R$  factor in the numerator and denominator of  $\frac{\tilde{\mathbf{m}}_t / (1 - \beta_1)}{\sqrt{\tilde{\mathbf{v}}_t / (1 - \beta_2)}}$  cancel each other. Therefore  
 576 we claim that the  $R$ -dependent DP-AdamW is in fact completely independent of  $R$ .  $\square$

### 577 B.3 Automatic per-layer clipping

In some cases, the per-layer clipping is desired, where we use a clipping threshold vector  $\mathbf{R} = [R_1, \dots, R_L]$  and each layer uses a different clipping threshold. We claim that DP optimizers under automatic clipping works with the per-layer clipping when  $\mathbf{R}$  is tuned proportionally, e.g.  $\mathbf{R} = R \cdot [a_1, \dots, a_L]$ , but not entry-wise (see counter-example in Fact B.1). One special case is the *uniform per-layer clipping* when  $R_1 = \dots = R_L = R/\sqrt{L}$ . This is widely applied as only one norm  $R$  requires tuning, instead of  $L$  norms in  $\mathbf{R}$ , particularly in the case of deep models with hundreds of layers. The corresponding DP-SGD with AUTO-S in (3.3) gives

$$\mathbf{w}_{t+1}^{(l)} = \mathbf{w}_t^{(l)} - \eta \left( \sum_{i \in B_t} \frac{R}{\sqrt{L}} \frac{\mathbf{g}_{t,i}^{(l)}}{\|\mathbf{g}_{t,i}^{(l)}\| + \gamma} + \sigma R \cdot \mathcal{N}(0, \mathbf{I}) \right)$$

578 Here the superscript  $(l)$  is the layer index. Clearly  $R$  couples with the learning rate  $\eta$  and the same  
 579 analysis as in Theorem 1 follows. The adaptive optimizers can be similarly analyzed from Theorem 2.  
 580 **Fact B.1.** Changing one clipping threshold in the clipping threshold vector  $\mathbf{R}$  (i.e. not proportionally)  
 581 can break the coupling with learning rate.

*Proof of Fact B.1.* We prove by a counter-example of  $\mathbf{R}$  in  $\mathbb{R}^2$ . Consider DP-SGD with per-layer clipping thresholds  $(R_1, R_2) = (9, 12)$ :

$$\mathbf{w}_{t+1}^{(l)} = \mathbf{w}_t^{(l)} - \eta \left( \sum_{i \in B} \frac{R_l \mathbf{g}_{t,i,l}}{\|\mathbf{g}_{t,i,l}\|} + \sigma \sqrt{R_1^2 + R_2^2} \cdot \mathcal{N}(0, \mathbf{I}) \right)$$

Increasing  $R_1$  from 9 to 16 changes the update for the first layer

$$\eta \left( \sum_{i \in B} \frac{9 \mathbf{g}_{t,i,l}}{\|\mathbf{g}_{t,i,l}\|} + 15\sigma \cdot \mathcal{N}(0, 1) \right) \rightarrow \eta \left( \sum_{i \in B} \frac{16 \mathbf{g}_{t,i,l}}{\|\mathbf{g}_{t,i,l}\|} + 20\sigma \cdot \mathcal{N}(0, \mathbf{I}) \right)$$

582 The noise-to-signal ratio decreases from 5/3 to 5/4 for this layer, and increases from 5/4 to 5/3 for the  
 583 second layer. This breaks the coupling with learning rate, since the coupling does not change the  
 584 noise-to-signal ratio.  $\square$

## 585 C Main results of convergence for DP-SGD with automatic clipping

### 586 C.1 Main proof of convergence for DP-SGD (the envelope version)

587 *Proof of Theorem 4.* In this section, we prove two parts of Theorem 4.

588 The first part of Theorem 4 is the upper bound on  $\min_t \mathbb{E}(\|g_t\|)$ , which is a direct result following  
 589 from Theorem 6, and we prove it in Appendix C.2.

590 **Theorem 6.** *Under Assumption 5.1, 5.2, 5.3, running DP-SGD with automatic clipping for  $T$*   
 591 *iterations gives*

$$\min_t \mathbb{E}(\|g_t\|) \leq \frac{\xi}{r} + \mathcal{F} \left( \frac{4}{\sqrt{T}} \sqrt{(\mathcal{L}_0 - \mathcal{L}_*)L \left( 1 + \frac{\sigma^2 d}{B^2} \right)}; r, \xi, \gamma \right) \quad (\text{C.1})$$

592 where

- 593 • for  $r < 1, \gamma = 0$  and  $\eta \propto 1/\sqrt{T}$ ,  $\mathcal{F}(x) = \frac{x}{\min_{0 < c < 1} f(c, r)}$  and  $f(c, r) := \frac{(1+rc)}{\sqrt{r^2+2rc+1}} +$   
 594  $\frac{(1-rc)}{\sqrt{r^2-2rc+1}}$ ; for  $r \geq 1, \gamma = 0$  and  $\eta \propto 1/\sqrt{T}$ ,  $\mathcal{F}(x) = \infty$ ;
- 595 • for  $r \geq 1, \gamma > 0$  and  $\eta \propto 1/\sqrt{T}$ ,  $\mathcal{F}$  is the convex envelope of (C.8), and is strictly increasing.

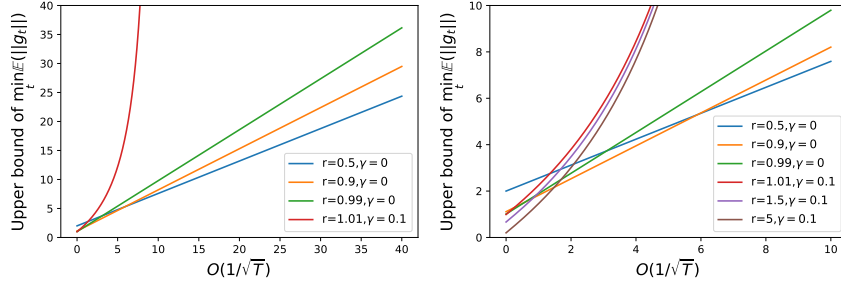

Figure 6: Visualization of upper bound  $\frac{\xi}{r} + \mathcal{F} \left( O(1/\sqrt{T}); r, \xi, \gamma \right)$  for gradient norm, with  $O(1/\sqrt{T})$  in (C.1). Here  $\xi = 1$ . The right plot is a zoom-in (with additional lines) of the left one.

596 Notice that, (C.1) holds for any  $r > 0$ . However, we have to consider an envelope curve over  $r$  in  
 597 (C.1) to reduce the upper bound: with AUTO-V clipping ( $\gamma = 0$ ), the upper bound in (C.1) is always  
 598 larger than  $\xi$  as  $r < 1$ ; we must use AUTO-S clipping ( $\gamma > 0$ ) to reduce the upper bound to zero, as  
 599 can be seen from Figure 6. In fact, larger  $T$  needs larger  $r$  to reduce the upper bound.

600 All in all, we specifically focus on  $r \geq 1$  and  $\gamma > 0$ , which is the only scenario that (C.1) can  
 601 converge to zero. This scenario is also where we prove the second part of Theorem 4.

602 The second part of Theorem 4 is the asymptotic convergence rate  $O(T^{-1/4})$  of DP-SGD, only  
 603 possible under  $r \geq 1$  and  $\gamma > 0$ .

By (C.1) in Theorem 6, our upper bound  $\mathcal{G}$  from Theorem 4 can be simplified to

$$\min_{r>0} \frac{\xi}{r} + (\mathcal{M}^{-1})_{ccv} \left( \frac{4}{\sqrt{T}} \sqrt{(\mathcal{L}_0 - \mathcal{L}_*)L \left( 1 + \frac{\sigma^2 d}{B^2} \right)}; r, \xi, \gamma \right)$$

604 where the function  $\mathcal{M}^{-1}$  is explicitly defined in (C.8) and the subscript *ccv* means the upper concave  
 605 envelope. Clearly, as  $T \rightarrow \infty$ ,  $\mathcal{M}^{-1}(\frac{1}{\sqrt{T}}) \rightarrow 0$ . We will next show that the convergence rate of  
 606  $\mathcal{M}^{-1}$  is indeed  $O(\frac{1}{\sqrt{T}})$  and the minimization over  $r$  makes the overall convergence rate  $O(T^{-1/4})$ .

607 Starting from (C.8), we denote  $x = \frac{4}{\sqrt{T}} \sqrt{(\mathcal{L}_0 - \mathcal{L}_*)L(1 + \frac{\sigma^2 d}{B^2})}$  and write

$$\begin{aligned}
\mathcal{M}^{-1}(x; r, \xi, \gamma) &= \frac{-\frac{\xi}{r}\gamma + (r^2 - 1)\frac{\xi}{r}x + r\gamma x + \gamma\sqrt{(\frac{\xi}{r})^2 + 2\xi x + 2\gamma x + x^2}}{2\gamma - (r^2 - 1)x} \\
&= \left( -\frac{\gamma\xi}{r} + (r^2 - 1)\frac{\xi}{r}x + r\gamma x + \gamma\sqrt{(\frac{\xi}{r})^2 + 2\xi x + 2\gamma x + x^2} \right) \\
&\quad \cdot \frac{1 + \frac{r^2 - 1}{2\gamma}x + O(x^2)}{2\gamma} \\
&= \frac{1}{2\gamma} \left( -\frac{\gamma\xi}{r} + (r^2 - 1)\frac{\xi}{r}x + r\gamma x + \frac{\gamma\xi}{r} \sqrt{1 + \frac{2(\xi + \gamma)r^2 x}{\xi^2} + O(x^2)} \right) \\
&\quad \cdot \left( 1 + \frac{r^2 - 1}{2\gamma}x + O(x^2) \right) \\
&= \frac{1}{2\gamma} \left( -\frac{\gamma\xi}{r} + (r^2 - 1)\frac{\xi}{r}x + r\gamma x + \frac{\gamma\xi}{r} \left( 1 + \frac{(\xi + \gamma)r^2 x}{\xi^2} + O(x^2) \right) \right) \\
&\quad \cdot \left( 1 + \frac{r^2 - 1}{2\gamma}x + O(x^2) \right) \\
&= \frac{1}{2\gamma} \left( (r^2 - 1)\frac{\xi}{r}x + r\gamma x + \frac{\gamma(\xi + \gamma)r x}{\xi} + O(x^2) \right) \cdot \left( 1 + \frac{r^2 - 1}{2\gamma}x + O(x^2) \right) \\
&= \frac{1}{2\gamma} \left( (r^2 - 1)\frac{\xi}{r} + r\gamma + \frac{\gamma(\xi + \gamma)r}{\xi} \right) \cdot x + O(x^2) \\
&= \frac{1}{2\gamma} \left( \frac{(\xi + \gamma)^2}{\xi} r - \frac{\xi}{r} \right) \cdot x + O(x^2)
\end{aligned}$$

Since  $\mathcal{M}^{-1}$  is asymptotically linear as  $x \rightarrow 0$ , we instead study

$$\min_{r>0} \frac{\xi}{r} + \mathcal{M}^{-1}(x; r, \xi, \gamma) \equiv \min_{r>0} \frac{\xi}{r} + \frac{1}{2\gamma} \left( \frac{(\xi + \gamma)^2}{\xi} r - \frac{\xi}{r} \right) \cdot x + O(x^2).$$

608 That is, ignoring the higher order term for the asymptotic analysis, the  $\mathcal{M}^{-1}$  part converges as  
609  $O(x) = O(1/\sqrt{T})$ , and we visualize this in Figure 8.

Although DP-SGD converges faster than SGD, the former converges to  $\xi/r$  and the latter converges to 0. Thus, taking  $\xi/r$  into consideration, the objective reduces to a hyperbola

$$\frac{\left(\xi(1 - \frac{x}{2\gamma})\right)}{r} + \frac{x(\xi + \gamma)^2}{2\gamma\xi} \cdot r$$

610 whose minimum over  $r$  is obviously  $2\sqrt{\xi(1 - \frac{x}{2\gamma})\frac{x(\xi + \gamma)^2}{2\gamma\xi}} = O(\sqrt{x}) = O(T^{-1/4})$ .  $\square$

611 To give more details about the upper bound in (5.2), we demonstrate its dependence on  $\xi$  and  $\gamma$  in  
612 Figure 7.

## 613 C.2 Main proof of convergence for DP-SGD (the non-envelope version)

*Proof of Theorem 6.* Consider DP-SGD with AUTO-S clipping

$$\mathbf{w}_{t+1} = \mathbf{w}_t - \eta \left( \frac{\sum_i \tilde{\mathbf{g}}_{t,i}}{\|\tilde{\mathbf{g}}_{t,i}\| + \gamma} + \sigma\mathcal{N}(0, \mathbf{I}) \right)$$

614 where  $\tilde{\mathbf{g}}_{t,i}$  is i.i.d. samples of  $\tilde{\mathbf{g}}_t$ , an unbiased estimate of  $\mathbf{g}_t$ , with a bounded variance as described in  
615 Assumption 5.3.

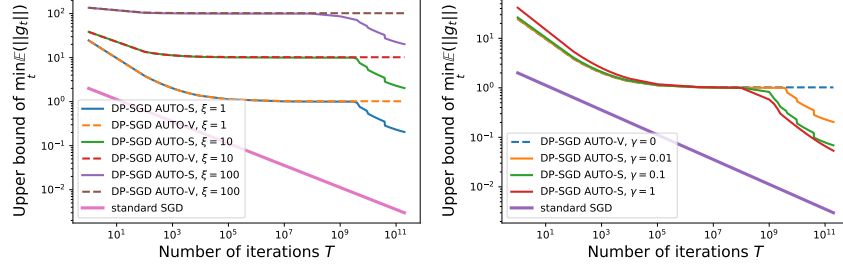

Figure 7: Dependence of the upper bound  $\mathcal{G}$  on  $\xi$  (left) and  $\gamma$  (right). Here the  $O(1/\sqrt{T})$  term is set to 10 and either  $\gamma = 0.01$  (left) or  $\xi = 1$  (right).

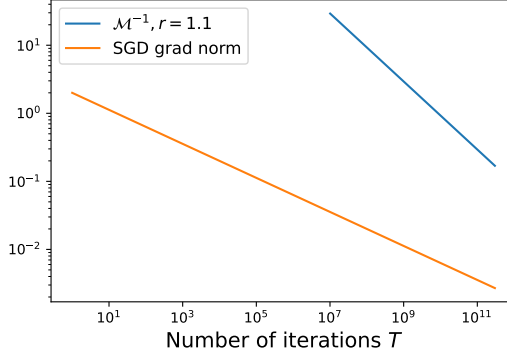

Figure 8: Convergence with respect to  $T$ . Same setting as Figure 5.

616 By Lipschitz smoothness in Assumption 5.2, and denoting  $Z = \mathcal{N}(0, \mathbf{I})$ , we have

$$\begin{aligned}
\mathcal{L}_{t+1} - \mathcal{L}_t &\leq \mathbf{g}_t^\top (\mathbf{w}_{t+1} - \mathbf{w}_t) + \frac{L}{2} \|\mathbf{w}_{t+1} - \mathbf{w}_t\|^2 \\
&= -\eta \mathbf{g}_t^\top \left( \sum_i \frac{\tilde{\mathbf{g}}_{t,i}}{\|\tilde{\mathbf{g}}_{t,i}\| + \gamma} + \sigma Z \right) + \frac{L\eta^2}{2} \left\| \sum_i \frac{\tilde{\mathbf{g}}_{t,i}}{\|\tilde{\mathbf{g}}_{t,i}\| + \gamma} + \sigma Z \right\|^2 \\
&\leq -\eta \mathbf{g}_t^\top \left( \sum_i \frac{\tilde{\mathbf{g}}_{t,i}}{\|\tilde{\mathbf{g}}_{t,i}\| + \gamma} + \sigma Z \right) \\
&\quad + L\eta^2 \left( \left\| \sum_i \frac{\tilde{\mathbf{g}}_{t,i}}{\|\tilde{\mathbf{g}}_{t,i}\| + \gamma} \right\|^2 + \sigma^2 \|Z\|^2 \right)
\end{aligned}$$

617 where the last inequality follows from Cauchy Schwartz.

618 Given the fact that  $\|\tilde{\mathbf{g}}_{t,i}/(\|\tilde{\mathbf{g}}_{t,i}\| + \gamma)\| \leq 1$ , the expected improvement at one iteration is

$$\begin{aligned}
\mathbb{E}(\mathcal{L}_{t+1} - \mathcal{L}_t | \mathbf{w}_t) &\leq -\eta \mathbf{g}_t^\top \mathbb{E} \left( \sum_i \frac{\tilde{\mathbf{g}}_{t,i}}{\|\tilde{\mathbf{g}}_{t,i}\| + \gamma} \right) + L\eta^2 (B^2 + \sigma^2 d) \\
&= -\eta B \mathbf{g}_t^\top \mathbb{E} \left( \frac{\tilde{\mathbf{g}}_t}{\|\tilde{\mathbf{g}}_t\| + \gamma} \right) + L\eta^2 (B^2 + \sigma^2 d)
\end{aligned} \tag{C.2}$$

619 Now we want to lower bound  $\mathbf{g}_t^\top \mathbb{E} \left( \frac{\tilde{\mathbf{g}}_t}{\|\tilde{\mathbf{g}}_t\| + \gamma} \right)$  in (C.2).

620 Write  $\tilde{\mathbf{g}}_t = \mathbf{g}_t + \Delta_t$  where the gradient noise  $\Delta_t$  follows  $\mathbb{E}\Delta_t = 0, \mathbb{E}\|\Delta_t\| < \xi$  by Assumption 5.3.  
 621 Then

$$\begin{aligned} \mathbf{g}_t^\top \mathbb{E} \left( \frac{\tilde{\mathbf{g}}_t}{\|\tilde{\mathbf{g}}_t\| + \gamma} \right) &= \mathbb{E} \left( \frac{\|\mathbf{g}_t\|^2 + \mathbf{g}_t^\top \Delta_t}{\|\mathbf{g}_t + \Delta_t\| + \gamma} \right) \\ &= \frac{1}{2} \mathbb{E} \left( \frac{\|\mathbf{g}_t\|^2 + \mathbf{g}_t^\top \Delta_t}{\|\mathbf{g}_t + \Delta_t\| + \gamma} \middle| \Delta_t \in H_+ \right) + \frac{1}{2} \mathbb{E} \left( \frac{\|\mathbf{g}_t\|^2 + \mathbf{g}_t^\top \Delta_t}{\|\mathbf{g}_t + \Delta_t\| + \gamma} \middle| \Delta_t \in H_- \right) \\ &= \frac{1}{2} \mathbb{E} \left( \frac{\|\mathbf{g}_t\|^2 + \mathbf{g}_t^\top \Delta_t}{\|\mathbf{g}_t + \Delta_t\| + \gamma} \middle| \Delta_t \in H_+ \right) + \frac{1}{2} \mathbb{E} \left( \frac{\|\mathbf{g}_t\|^2 - \mathbf{g}_t^\top \Delta_t}{\|\mathbf{g}_t - \Delta_t\| + \gamma} \middle| \Delta_t \in H_+ \right) \end{aligned}$$

622 where we use the hyperplane perpendicular to  $\mathbf{g}_t$  to divide the support of  $\Delta_t$  into two half-spaces:

$$H_+ := \{\mathbf{v} : \mathbf{g}_t^\top \mathbf{v} > 0\}, \quad H_- := \{\mathbf{v} : \mathbf{g}_t^\top \mathbf{v} < 0\}.$$

We use the symmetry assumption in Assumption 5.3 to get

$$\mathbb{P}(\Delta_t \in H_+) = \mathbb{P}(\Delta_t \in H_-) = \frac{1}{2}$$

623 and notice that  $\Delta_t \stackrel{D}{=} -\Delta_t$ , i.e., if  $\Delta_t \in H_+$ , then  $-\Delta_t \in H_-$  with the same distribution.

624 The next result further gives a lower bound for  $\mathbf{g}_t^\top \mathbb{E} \left( \frac{\tilde{\mathbf{g}}_t}{\|\tilde{\mathbf{g}}_t\| + \gamma} \right)$  using  $\|\mathbf{g}_t\|$ .

**Lemma C.1.**

$$\mathbb{E} \left( \frac{\|\mathbf{g}_t\|^2 + \mathbf{g}_t^\top \Delta_t}{\|\mathbf{g}_t + \Delta_t\| + \gamma} + \frac{\|\mathbf{g}_t\|^2 - \mathbf{g}_t^\top \Delta_t}{\|\mathbf{g}_t - \Delta_t\| + \gamma} \middle| \Delta_t \in H_+ \right) \geq \min_{0 < c \leq 1} f(c, r; \frac{\gamma}{\|\mathbf{g}_t\|}) \cdot (\|\mathbf{g}_t\| - \xi/r)$$

625 for any  $r > 0$  and  $f(c, r; \Gamma) = \frac{(1+rc)}{\sqrt{r^2+2rc+1+\Gamma}} + \frac{(1-rc)}{\sqrt{r^2-2rc+1+\Gamma}}$ .

626 For the simplicity of notation, we denote the distance measure

$$\mathcal{M}(\|\mathbf{g}_t\| - \xi/r; r, \xi, \gamma) = \min_{0 < c \leq 1} f \left( c, r; \frac{\gamma}{\|\mathbf{g}_t\|} \right) \cdot (\|\mathbf{g}_t\| - \xi/r) \quad (\text{C.3})$$

627 and leave the fine-grained analysis (e.g. its explicit form in some scenarios) at the end of this section.

628 Using the lower bound from Lemma C.1, the expected improvement (C.2) becomes

$$\mathbb{E}(\mathcal{L}_{t+1} - \mathcal{L}_t | \mathbf{w}_t) \leq -\frac{\eta B}{2} \mathcal{M}(\|\mathbf{g}_t\| - \xi/r) + L\eta^2 B^2 \left( 1 + \frac{\sigma^2 d}{B^2} \right)$$

629 Now extend the expectation over randomness in the trajectory, and perform a telescoping sum over  
 630 the iterations

$$\begin{aligned} \mathcal{L}_0 - \mathcal{L}_* &\geq \mathcal{L}_0 - \mathbb{E}\mathcal{L}_T = \sum_t \mathbb{E}(\mathcal{L}_t - \mathcal{L}_{t+1}) \\ &\geq \frac{\eta B}{2} \mathbb{E} \left( \sum_t \mathcal{M}(\|\mathbf{g}_t\| - \xi/r) \right) - TL\eta^2 B^2 \left( 1 + \frac{\sigma^2 d}{B^2} \right) \end{aligned}$$

631 Substituting  $\eta B = \eta_0/\sqrt{T}$  where  $\eta_0$  is a base learning rate, we have

$$2(\mathcal{L}_0 - \mathcal{L}_*) \geq \sqrt{T}\eta_0 \mathbb{E} \left( \frac{1}{T} \sum_t \mathcal{M}(\|\mathbf{g}_t\| - \xi/r) \right) - 2L\eta_0^2 \left( 1 + \frac{\sigma^2 d}{B^2} \right)$$

632 and finally

$$\mathbb{E} \left( \frac{1}{T} \sum_t \mathcal{M}(\|\mathbf{g}_t\| - \xi/r) \right) \leq \frac{1}{\sqrt{T}} \left[ \frac{2(\mathcal{L}_0 - \mathcal{L}_*)}{\eta_0} + 2L\eta_0 \left( 1 + \frac{\sigma^2 d}{B^2} \right) \right] \quad (\text{C.4})$$

633 With  $\eta_0$  chosen properly at  $\eta_0 = \sqrt{\frac{\mathcal{L}_0 - \mathcal{L}_*}{L(1 + \frac{\sigma^2 d}{B^2})}}$ , the hyperbola on the right hand side in (C.4) is

634 minimized to  $4\sqrt{(\mathcal{L}_0 - \mathcal{L}_*)L(1 + \frac{\sigma^2 d}{B^2})}$ , and we obtain

$$\mathbb{E} \left( \frac{1}{T} \sum_t \mathcal{M}(\|\mathbf{g}_t\| - \xi/r) \right) \leq \frac{4}{\sqrt{T}} \sqrt{(\mathcal{L}_0 - \mathcal{L}_*)L \left( 1 + \frac{\sigma^2 d}{B^2} \right)}$$

635 Since the minimum of a sequence is smaller than the average, we have

$$\min_t \mathbb{E}(\mathcal{M}(\|\mathbf{g}_t\| - \xi/r)) \leq \frac{1}{T} \sum_t \mathbb{E}(\mathcal{M}(\|\mathbf{g}_t\| - \xi/r)) \leq \frac{4}{\sqrt{T}} \sqrt{(\mathcal{L}_0 - \mathcal{L}_*)L \left( 1 + \frac{\sigma^2 d}{B^2} \right)} \quad (\text{C.5})$$

636 We claim that  $\mathcal{M}$  may not be concave or convex. Therefore we use  $\mathcal{M}_{cvx}$  to denote its lower convex  
637 envelope, i.e. the largest convex function that is smaller than  $\mathcal{M}$ . Then by Jensen's inequality (C.5)  
638 becomes

$$\min_t \mathcal{M}_{cvx}(\mathbb{E}(\|\mathbf{g}_t\| - \xi/r)) \leq \min_t \mathbb{E}(\mathcal{M}_{cvx}(\|\mathbf{g}_t\| - \xi/r)) \leq \frac{4}{\sqrt{T}} \sqrt{(\mathcal{L}_0 - \mathcal{L}_*)L \left( 1 + \frac{\sigma^2 d}{B^2} \right)} \quad (\text{C.6})$$

639 It is obvious that  $\mathcal{M}_{cvx}$  is increasing as  $\mathcal{M}$  is increasing by Theorem 8. Hence,  $(\mathcal{M}_{cvx})^{-1}$  is also  
640 increasing, as the inverse of  $\mathcal{M}_{cvx}$ . We write (C.6) as

$$\min_t \mathbb{E}(\|\mathbf{g}_t\| - \xi/r) \leq (\mathcal{M}_{cvx})^{-1} \left( \frac{4}{\sqrt{T}} \sqrt{(\mathcal{L}_0 - \mathcal{L}_*)L \left( 1 + \frac{\sigma^2 d}{B^2} \right)} \right)$$

641 and equivalently

$$\min_t \mathbb{E}(\|\mathbf{g}_t\|) \leq \frac{\xi}{r} + (\mathcal{M}_{cvx})^{-1} \left( \frac{4}{\sqrt{T}} \sqrt{(\mathcal{L}_0 - \mathcal{L}_*)L \left( 1 + \frac{\sigma^2 d}{B^2} \right)} \right) \quad (\text{C.7})$$

642 Finally, we derive the explicit properties of  $\mathcal{M}(\|\mathbf{g}_t\| - \xi/r)$  in Theorem 8. These properties allow  
643 us to further analyze on the convergence of  $\mathcal{M}(\|\mathbf{g}_t\| - \xi/r)$ , based on AUTO-V and AUTO-S,  
644 respectively.

**1. DP-SGD with AUTO-V clipping.** By Theorem 8, we write

$$\mathcal{M}(x; r) = \min_{c \in (0, 1]} f(c, r; 0) \cdot x$$

645 This is a linear function and thus  $\mathcal{M}_{cvx} = \mathcal{M} = 1/\mathcal{M}_{cvx}^{-1}$ . As a result, we have

$$\min_t \mathbb{E}(\|\mathbf{g}_t\|) \leq \frac{\xi}{r} + \frac{1}{\min_{c \in (0, 1]} f(c, r; 0)} \cdot \frac{4}{\sqrt{T}} \sqrt{(\mathcal{L}_0 - \mathcal{L}_*)L \left( 1 + \frac{\sigma^2 d}{B^2} \right)}$$

646 We note here  $r$  plays an important role under AUTO-V clipping: when  $r < 1$ , we spend more iterations  
647 to converge to better and smaller gradient norm  $\xi/r$ ; when  $r \geq 1$ ,  $\min_c f(c, r; 0) = f(1, r; 0) = 0$   
648 and it takes forever to converge. This is demonstrated in the left plot of Figure 5.

**2. DP-SGD with AUTO-S clipping.** By Theorem 8 and for  $r > 1$ , we write

$$\mathcal{M}(x; r, \xi, \gamma) = \left( \frac{\gamma}{(r-1)(x + \xi/r) + \gamma} - \frac{\gamma}{(r+1)(x + \xi/r) + \gamma} \right) \cdot x.$$

649 Notice that the inverse of a lower convex envelope is equivalent to the upper concave envelope  
650 (denoted by the subscript  $ccv$ ) of an inverse. Therefore we can derive  $(\mathcal{M}_{cvx})^{-1} = (\mathcal{M}^{-1})_{ccv}$  with  
651 the explicit form

$$\mathcal{M}^{-1}(x; r, \xi, \gamma) = \frac{-\frac{\xi}{r}\gamma + (r^2 - 1)\frac{\xi}{r}x + r\gamma x + \gamma\sqrt{\left(\frac{\xi}{r}\right)^2 + 2\xi x + 2\gamma x + x^2}}{2\gamma - (r^2 - 1)x}. \quad (\text{C.8})$$

652 we can derive it based on  $r, \xi, \gamma$  and substitute back to (C.7).

653 Note that the domain of  $\mathcal{M}^{-1}$  (or the image of  $\mathcal{M}$ ) is  $[0, \frac{\gamma}{r-1} - \frac{\gamma}{r+1}]$ .

654 In comparison to the AUTO-V clipping,  $\mathcal{M}^{-1}$  takes a much more complicated form, as depicted in  
 655 the middle plot of Figure 5, where  $r > 1$  plays an important role for the gradient norm to converge to  
 656 zero.  $\square$

### 657 C.3 Proof of Lemma C.1

658 *Proof of Lemma C.1.* We want to lower bound

$$\mathbb{E} \left( \frac{\|\mathbf{g}_t\|^2 + \mathbf{g}_t^\top \Delta_t}{\|\mathbf{g}_t + \Delta_t\| + \gamma} + \frac{\|\mathbf{g}_t\|^2 - \mathbf{g}_t^\top \Delta_t}{\|\mathbf{g}_t - \Delta_t\| + \gamma} \middle| \Delta_t \in H_+ \right) \quad (\text{C.9})$$

659 To simplify the notation, we denote noise-to-signal ratio  $S := \frac{\|\Delta_t\|}{\|\mathbf{g}_t\|}$  and  $c := \cos \theta = \frac{\mathbf{g}_t^\top \Delta_t}{\|\mathbf{g}_t\| \|\Delta_t\|}$ , with  
 660  $\theta$  be the random angle between  $\mathbf{g}_t$  and  $\Delta_t$ . Note that  $0 < c \leq 1$  when  $\Delta_t \in H_+$ .

661 The term inside the conditional expectation in (C.9) can be written as

$$\begin{aligned} & \frac{(1+Sc)\|\mathbf{g}_t\|^2}{\sqrt{S^2+2Sc+1}\|\mathbf{g}_t\|+\gamma} + \frac{(1-Sc)\|\mathbf{g}_t\|^2}{\sqrt{S^2-2Sc+1}\|\mathbf{g}_t\|+\gamma} \\ = & \|\mathbf{g}_t\| \left( \frac{(1+Sc)}{\sqrt{S^2+2Sc+1}+\gamma/\|\mathbf{g}_t\|} + \frac{(1-Sc)}{\sqrt{S^2-2Sc+1}+\gamma/\|\mathbf{g}_t\|} \right) \end{aligned}$$

662 Defining  $\Gamma = \gamma/\|\mathbf{g}_t\|$  and

$$f(c, S; \Gamma) := \frac{(1+Sc)}{\sqrt{S^2+2Sc+1}+\Gamma} + \frac{(1-Sc)}{\sqrt{S^2-2Sc+1}+\Gamma}, \quad (\text{C.10})$$

663 we turn the conditional expectation in (C.9) into

$$\mathbb{E} \left( \frac{\|\mathbf{g}_t\|^2 + \mathbf{g}_t^\top \Delta_t}{\|\mathbf{g}_t + \Delta_t\| + \gamma} + \frac{\|\mathbf{g}_t\|^2 - \mathbf{g}_t^\top \Delta_t}{\|\mathbf{g}_t - \Delta_t\| + \gamma} \middle| \Delta_t \in H_+ \right) = \|\mathbf{g}_t\| \mathbb{E}(f(c, S; \Gamma) | \Delta_t \in H_+) \quad (\text{C.11})$$

664 for which we want to lower bound  $f(c, S; \Gamma)$  over  $0 < c \leq 1, S > 0, \Gamma > 0$ . We use the next theorem  
 665 to prepare some helpful properties. The proof can be found in Appendix E.1.

666 **Theorem 7.** For  $f$  defined in (C.10), we have

- 667 1.  $f(c, S; \Gamma)$  is strictly decreasing in  $S$  for all  $0 < c < 1$  and  $\Gamma > 0$ .
- 668 2. Consequently,  $\min_{c \in (0,1)} f(c, S; \Gamma)$  is strictly decreasing in  $S$ .
- 669 3.  $f(c, S; \Gamma)$  is strictly decreasing in  $c$  for all  $S > 1$  and  $\Gamma > 0$ .

670 We consider a thresholding ratio  $r > 0$  and we will focus on the regime that  $S < r$ . This  $r$  will turn  
 671 out to measure the minimum gradient norm at convergence: informally speaking,  $\|\mathbf{g}_t\|$  converges to  
 672  $\xi/r$ .



673 By the law of total expectation, (C.11) can be relaxed as follows.

$$\begin{aligned}
& \|\mathbf{g}_t\| \mathbb{E} \left( f(c, S; \Gamma) \middle| \Delta \in H_+ \right) \\
&= \|\mathbf{g}_t\| \mathbb{E} \left( f(c, S; \Gamma) \middle| \Delta \in H_+, S < r \right) \mathbb{P}(r \|\mathbf{g}_t\| > \|\Delta\| \middle| \Delta \in H_+) \\
&\quad + \|\mathbf{g}_t\| \mathbb{E} \left( f(c, S; \Gamma) \middle| \Delta \in H_+, S > r \right) \mathbb{P}(r \|\mathbf{g}_t\| < \|\Delta\| \middle| \Delta \in H_+) \\
&\geq \|\mathbf{g}_t\| \mathbb{E} \left( f(c, S; \Gamma) \middle| \Delta \in H_+, S < r \right) \mathbb{P}(r \|\mathbf{g}_t\| > \|\Delta\| \middle| \Delta \in H_+) \tag{C.12} \\
&\geq \|\mathbf{g}_t\| \mathbb{E} \left( f(c, r; \Gamma) \middle| \Delta \in H_+, S < r \right) \mathbb{P}(r \|\mathbf{g}_t\| > \|\Delta\| \middle| \Delta \in H_+) \\
&= \|\mathbf{g}_t\| \mathbb{E} \left( f(c, r; \Gamma) \middle| \Delta \in H_+, S < r \right) \mathbb{P}(r \|\mathbf{g}_t\| > \|\Delta\|) \\
&\geq \min_{c \in (0,1]} f(c, r; \Gamma) \cdot \underbrace{\|\mathbf{g}_t\| \mathbb{P}(r \|\mathbf{g}_t\| > \|\Delta\|)}_{\otimes}
\end{aligned}$$

674 where in the first inequality, the ignoring of last term is justified by  $f(c, S; \Gamma) \geq$   
675  $\min_{c \in (0,1]} f(c, S; \Gamma) \geq \min_{c \in (0,1]} f(c, \infty; \Gamma) = 0$ , from the monotonicity (second statement) in  
676 Theorem 7.

We first lower bound  $\otimes$  by applying the Markov's inequality:

$$\mathbb{P}(r \|\mathbf{g}_t\| > \|\Delta_t\|) \geq 1 - \frac{\mathbb{E}\|\Delta_t\|}{r \|\mathbf{g}_t\|}$$

and hence by Assumption 5.3,

$$\|\mathbf{g}_t\| \mathbb{P}(r \|\mathbf{g}_t\| > \|\Delta_t\|) \geq \|\mathbf{g}_t\| - \mathbb{E}\|\Delta\|/r \geq \|\mathbf{g}_t\| - \xi/r.$$

677 Finally, the conditional expectation of interest in (C.9) gives

$$\mathbb{E} \left( \frac{\|\mathbf{g}_t\|^2 + \mathbf{g}_t^\top \Delta_t}{\|\mathbf{g}_t + \Delta_t\|} + \frac{\|\mathbf{g}_t\|^2 - \mathbf{g}_t^\top \Delta_t}{\|\mathbf{g}_t - \Delta_t\|} \middle| \Delta_t \in H_+ \right) \geq \min_{0 < c \leq 1} f(c, r; \frac{\gamma}{\|\mathbf{g}_t\|}) \cdot (\|\mathbf{g}_t\| - \xi/r)$$

678 □

#### 679 C.4 Proof of Theorem 8

680 To derive some properties of  $\min_c f(c, r; \Gamma)$ , we need to compute separately for AUTO-V (without  
681 the stability constant,  $\Gamma = 0$ ) and for AUTO-S (with the stability constant,  $\Gamma > 0$ ), as shown in  
682 Theorem 8. As we will show, as the number of training iterations  $T \rightarrow \infty$ , DP-SGD with AUTO-V  
683 clipping can only compress  $\|\mathbf{g}_t\|$  to  $\xi/r$  for  $r < 1$ . However, DP-SGD with AUTO-S clipping can  
684 compress  $\|\mathbf{g}_t\|$  to  $\xi/r$  to any  $r > 1$ .

##### 685 Theorem 8.

1. For  $0 < r < 1$  and  $\Gamma = 0$ , we have  $\min_{c \in (0,1]} f(c, r; 0) > 0$ . Then Equation (C.11) is lower bounded by

$$\min_{c \in (0,1]} f(c, r; 0) \cdot (\|\mathbf{g}_t\| - \xi/r)$$

686 which is increasing in  $\|\mathbf{g}_t\| - \xi/r$ .

2. For  $r \geq 1$  and  $\Gamma = 0$ , we have  $\min_{c \in (0,1]} f(c, r; \Gamma) = f(1, r; 0) = 0$ . In words, (C.9) has a trivial lower bound and Theorem 6 cannot compress  $\|\mathbf{g}_t\|$  to  $\xi/r$ .

688

3. For  $r \geq 1$  and  $\Gamma > 0$ , we have  $\min_{c \in (0,1]} f(c, r; \Gamma) = f(1, r; \Gamma) = \left( \frac{\Gamma}{r+\Gamma-1} - \frac{\Gamma}{r+\Gamma+1} \right)$ . Then Equation (C.11) is lower bounded by

$$\left( \frac{\gamma}{(r-1)\|\mathbf{g}_t\| + \gamma} - \frac{\gamma}{(r+1)\|\mathbf{g}_t\| + \gamma} \right) \cdot (\|\mathbf{g}_t\| - \xi/r)$$

689 which is increasing in  $\|\mathbf{g}_t\| - \xi/r$ .

690 *Proof.* To prove statement 1, we use the second statement from Theorem 7 and show that  
691  $\min_c f(c, r; 0) > \min_c f(c, \infty; 0) = 0$ . To prove statement 2 and 3, we use the third statement from  
692 Theorem 7 and see that  $\min_c f(c, r; \Gamma) = f(1, r; \Gamma)$  with an explicit formula. □

693 **D Convergence rate of standard SGD**

**Theorem 9.** Under Assumption 5.1, 5.2, 5.3 (without the symmetry assumption), running the standard non-DP SGD for  $T$  iterations gives, for  $\eta \propto 1/\sqrt{T}$ ,

$$\min_t \mathbb{E} (\|\mathbf{g}_t\|) \leq \frac{1}{T^{1/4}} \sqrt{2(\mathcal{L}_0 - \mathcal{L}_*)L + \frac{\xi^2}{B}}$$

*Proof of Theorem 9.* Consider the standard SGD

$$\mathbf{w}_{t+1} = \mathbf{w}_t - \eta \frac{\sum_i \tilde{\mathbf{g}}_{t,i}}{B}$$

694 where  $\tilde{\mathbf{g}}_{t,i}$  is i.i.d. unbiased estimate of  $\mathbf{g}_t$ , with a bounded variance as described in Assumption 5.3.

695 By Lipschitz smoothness assumption in Assumption 5.2,

$$\mathcal{L}_{t+1} - \mathcal{L}_t \leq \mathbf{g}_t^\top (\mathbf{w}_{t+1} - \mathbf{w}_t) + \frac{L}{2} \|\mathbf{w}_{t+1} - \mathbf{w}_t\|^2 = -\eta \mathbf{g}_t^\top \left( \sum_i \frac{1}{B} \tilde{\mathbf{g}}_{t,i} \right) + \frac{L\eta^2}{2} \left\| \sum_i \frac{1}{B} \tilde{\mathbf{g}}_{t,i} \right\|^2$$

696 The expected improvement at one iteration is

$$\begin{aligned} \mathbb{E}(\mathcal{L}_{t+1} - \mathcal{L}_t | \mathbf{w}_t) &\leq -\eta \mathbf{g}_t^\top \mathbb{E} \tilde{\mathbf{g}}_{t,i} + \frac{L\eta^2}{2} \mathbb{E} \left\| \sum_i \frac{1}{B} \tilde{\mathbf{g}}_{t,i} \right\|^2 \\ &\leq -\eta \|\mathbf{g}_t\|^2 + \frac{L\eta^2}{2} \left( \|\mathbf{g}_t\|^2 + \frac{\xi^2}{B} \right) \end{aligned} \tag{D.1}$$

697 Now we extend the expectation over randomness in the trajectory, and perform a telescoping sum  
698 over the iterations

$$\mathcal{L}_0 - \mathcal{L}_* \geq \mathcal{L}_0 - \mathbb{E} \mathcal{L}_T = \sum_t \mathbb{E}(\mathcal{L}_t - \mathcal{L}_{t+1}) \geq \left( \eta - \frac{L\eta^2}{2} \right) \mathbb{E} \left( \sum_t \|\mathbf{g}_t\|^2 \right) - \frac{TL\eta^2 \xi^2}{2B}$$

699 Notice that we do not need the symmetry assumption in Assumption 5.3 in the non-DP SGD analysis.

700 We apply the same learning rate as in [5],  $\eta = \frac{1}{L\sqrt{T}}$ ,

$$2(\mathcal{L}_0 - \mathcal{L}_*) \geq \left( \frac{2}{L\sqrt{T}} - \frac{1}{LT} \right) \mathbb{E} \left( \sum_t \|\mathbf{g}_t\|^2 \right) - \frac{T\xi^2}{BLT} \geq \frac{\sqrt{T}}{L} \mathbb{E} \left( \frac{1}{T} \sum_t \|\mathbf{g}_t\|^2 \right) - \frac{\xi^2}{BL}$$

701 and finally

$$\min_t \mathbb{E} (\|\mathbf{g}_t\|^2) \leq \mathbb{E} \left( \frac{1}{T} \sum_t \|\mathbf{g}_t\|^2 \right) \leq \frac{1}{\sqrt{T}} \left[ 2(\mathcal{L}_0 - \mathcal{L}_*)L + \frac{\xi^2}{B} \right]$$

702 Using the Jensen's inequality, we can have

$$\min_t \mathbb{E} (\|\mathbf{g}_t\|) \leq \frac{1}{T^{1/4}} \sqrt{2(\mathcal{L}_0 - \mathcal{L}_*)L + \frac{\xi^2}{B}}$$

703 □

704 **E Auxiliary proofs**

705 **E.1 Proof of Theorem 7**

706 *Proof.* We first show  $\frac{df(c,S;\Gamma)}{dS} < 0$  for all  $0 < c < 1$ ,  $\Gamma > 0$  and  $S > 0$ , as visualized in the left plot  
707 of Figure 9. We can explicitly write down the derivative, by WolframAlpha

$$\frac{df(c, S; \Gamma)}{dS} = \frac{-(A\Gamma^2 + B\Gamma + C)}{\sqrt{S^2 - 2cS + 1} \sqrt{S^2 + 2cS + 1} (\Gamma + \sqrt{S^2 - 2cS + 1})^2 (\Gamma + \sqrt{S^2 + 2cS + 1})^2} \tag{E.1}$$

708 with

$$\begin{aligned}
A(c, S) &= \sqrt{S^2 + 2cS + 1} (3c^2S - 2c(S^2 + 1) + S) + \sqrt{S^2 - 2cS + 1} (3c^2S + 2c(S^2 + 1) + S) \\
B(c, S) &= 4S \left[ (S^2 + 1)(1 - c^2) + c^2 \sqrt{S^2 + 2cS + 1} \sqrt{S^2 - 2cS + 1} \right] \\
C(c, S) &= (1 - c^2)S \left[ (S^2 - 2cS + 1)^{3/2} + (S^2 + 2cS + 1)^{3/2} \right]
\end{aligned}$$

709 It is obvious that, since  $c < 1$ ,

$$S^2 \pm 2cS + 1 > S^2 \pm 2cS + c^2 = (S \pm c)^2 \geq 0. \quad (\text{E.2})$$

710 From (E.2), the denominator in (E.1) is positive and it suffices to show  $A\Gamma^2 + B\Gamma + C > 0$  for all  
711  $0 < c < 1$  and  $S > 0$ , in order to show  $\frac{df}{dS} < 0$ .

712 Also from (E.2), we can easily see  $B(c, S) > 0$  and  $C(c, S) > 0$ . We will show that  $A(c, S) > 0$  in  
713 Lemma E.1, after very heavy algebraic computation.

714 Now we can claim that  $A\Gamma^2 + B\Gamma + C > 0$  by Fact E.3, and complete the proof of the first statement.

To further see that  $\min_c f(c, S; \Gamma)$  is decreasing in  $S$ , let us denote  $c^*(x; \Gamma) := \arg \min_{c \in [0, 1]} f(c, x; \Gamma)$ . Then considering  $S < S'$ , we prove the second statement by observing

$$\min_c f(c, S; \Gamma) = f(c^*(S; \Gamma), S; \Gamma) > f(c^*(S; \Gamma), S'; \Gamma) \geq \min_c f(c, S'; \Gamma).$$

715 This statement is also visualized in the right plot of Figure 9.

716 We next show  $\frac{df(c, S; \Gamma)}{dc} < 0$  for all  $0 < c < 1, \Gamma > 0$  and  $S > 1$ . We can explicitly write down the  
717 derivative, by WolframAlpha

$$\frac{df(c, S; \Gamma)}{dc} = \frac{-S(A'\Gamma^2 + B'\Gamma + C')}{\sqrt{S^2 - 2cS + 1} \sqrt{S^2 + 2cS + 1} (\Gamma + \sqrt{S^2 - 2cS + 1})^2 (\Gamma + \sqrt{S^2 + 2cS + 1})^2} \quad (\text{E.3})$$

718 with

$$\begin{aligned}
A'(c, S) &= \left[ (S^2 + 3cS + 2) \sqrt{S^2 - 2cS + 1} - (S^2 - 3cS + 2) \sqrt{S^2 + 2cS + 1} \right] \\
B'(c, S) &= 4Sc \left[ \sqrt{S^2 + 2cS + 1} \sqrt{S^2 - 2cS + 1} + (S^2 - 1) \right] \\
C'(c, S) &= S \left[ (c + S)(S^2 - 2cS + 1)^{3/2} + (c - S)(S^2 + 2cS + 1)^{3/2} \right]
\end{aligned}$$

719 Clearly  $B'(c, S) > 0$  and  $C'(c, S) > 0$ , since  $S^2 + 2cS + 1 > S^2 - 2cS + c^2 = (S - c)^2 \geq 0$ . And  
720 we will show  $A'(c, S) > 0$  in Lemma E.2, after some algebra.

721 We again claim that  $A'\Gamma^2 + B'\Gamma + C' > 0$  by Fact E.3, which guarantees that the numerator in (E.3)  
722 is negative and that  $\frac{df}{dc} < 0$ . This is visualized in Figure 10.  $\square$

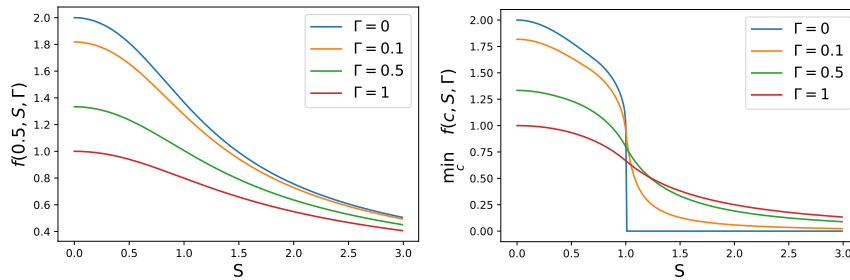

Figure 9: Visualization of  $f(0.5, S, \Gamma)$  (left) and  $\min_{0 \leq c \leq 1} f(c, S, \Gamma)$  over  $S > 0$ .

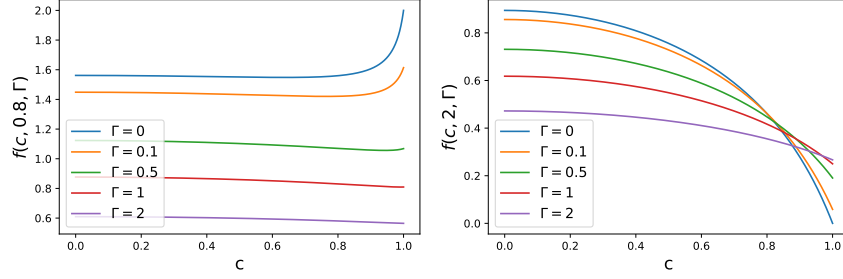

Figure 10: Visualization of  $f(c, 0.8, \Gamma)$  (left) and  $f(c, 2, \Gamma)$  over  $0 \leq c \leq 1$ .

## 723 E.2 Proof of Lemma E.1

**Lemma E.1.** For all  $0 < c < 1$  and  $S > 0$ ,

$$A := \sqrt{S^2 + 2cS + 1} (3c^2S - 2c(S^2 + 1) + S) + \sqrt{S^2 - 2cS + 1} (3c^2S + 2c(S^2 + 1) + S) > 0.$$

*Proof.* We prove by contradiction. Suppose

$$\sqrt{S^2 + 2cS + 1} (3c^2S - 2c(S^2 + 1) + S) + \sqrt{S^2 - 2cS + 1} (3c^2S + 2c(S^2 + 1) + S) < 0.$$

Then

$$0 < \sqrt{S^2 - 2cS + 1} (3c^2S + 2c(S^2 + 1) + S) < -\sqrt{S^2 + 2cS + 1} (3c^2S - 2c(S^2 + 1) + S).$$

724 where the first inequality comes from  $S^2 - 2cS + 1 > S^2 - 2cS + c^2 = (S - c)^2 \geq 0$ .

Squaring everything gives

$$(S^2 - 2cS + 1) (3c^2S + 2c(S^2 + 1) + S)^2 < (S^2 + 2cS + 1) (3c^2S - 2c(S^2 + 1) + S)^2.$$

Taking the difference gives

$$4cS(2 + 3S^2 - 9c^4S^2 + 2S^4 + 2c^2(1 - S^2 + S^4)) < 0$$

Given that  $c > 0, S > 0$ , we have

$$2 + 3S^2 - 9c^4S^2 + 2S^4 + 2c^2(1 - S^2 + S^4) < 0$$

Denoting  $X := S^2$  and viewing the above as a quadratic polynomial of  $X$ , we have

$$\underbrace{(2c^2 + 2)X^2 + (3 - 2c^2 - 9c^4)X + (2c^2 + 2)}_{\textcircled{1}} < 0$$

Using the closed-form minimizer of quadratic polynomial  $\textcircled{1}$ , after some heavy algebra, one can check the minimum of  $\textcircled{1}$  is

$$\frac{(1 + 3c^2)^2(1 - c^2)(7 + 9c^2)}{8(1 + c^2)}$$

725 which is clearly positive. Contradiction! □

## 726 E.3 Proof of Lemma E.2

**Lemma E.2.** For all  $0 < c < 1$  and  $S > 1$ ,

$$(S^2 + 3cS + 2)\sqrt{S^2 - 2cS + 1} - (S^2 - 3cS + 2)\sqrt{S^2 + 2cS + 1} > 0.$$

727 *Proof.* Notice that  $(S^2 + 3cS + 2) > S^2 + 2 > 0$  and  $\sqrt{S^2 \pm 2cS + 1} > 0$ . Therefore if  $S^2 - 3cS +$   
728  $2 \leq 0$ , we are done.

Otherwise, we prove by contradiction and suppose

$$0 < (S^2 + 3cS + 2)\sqrt{S^2 - 2cS + 1} < (S^2 - 3cS + 2)\sqrt{S^2 + 2cS + 1}.$$

729 under the condition that  $S^2 - 3cS + 2 > 0$ .

Squaring everything gives

$$(S^2 + 3cS + 2)^2(S^2 - 2cS + 1) < (S^2 - 3cS + 2)^2(S^2 + 2cS + 1).$$

Taking the difference gives

$$cS(8 + 20S^2 - 36c^2S^2 + 8S^4) < 0$$

Given that  $c > 0, S > 0$ , we have

$$2 + 5S^2 - 9c^2S^2 + 2S^4 < 0$$

Denoting  $X := S^2$  and viewing the above as a quadratic polynomial of  $X$ , we have, for  $X > 1$ ,

$$\underbrace{2X^2 + (5 - 9c^2)X + 2}_{\textcircled{2}} < 0$$

730 The closed-form minimizer of quadratic polynomial  $\textcircled{2}$  is  $\frac{(9c^2-5)}{4}$ . Given that  $0 < c < 1$ , we must  
 731 have  $-\frac{5}{4} < \frac{9c^2-5}{4} < 1$ . Hence the minimizer is not within the feasible domain  $(1, \infty)$  of  $X$ . Thus  
 732 the minimum of  $\textcircled{2}$  is achieved with  $X = 1$  at  $9(1 - c^2)$ . This is positive. Contradiction!  $\square$

#### 733 E.4 Proof of Fact E.3

734 **Fact E.3.** For a quadratic polynomial  $Ax^2 + Bx + C$  with  $A, B, C > 0$ , the minimum value on the  
 735 domain  $x \geq 0$  is  $C$ , at  $x = 0$ . Therefore  $Ax^2 + Bx + C > 0$ .

736 *Proof.* Since  $A > 0$ , the quadratic polynomial is convex and increasing on the domain  $x > -\frac{B}{2A}$ .  
 737 Since  $B > 0$  as well, we know  $-\frac{B}{2A} < 0$  and hence the quadratic polynomial is strictly increasing on  
 738  $x > 0$ . Therefore the minimum value is achieved when  $x = 0$ , and we obtain  $Ax^2 + Bx + C \geq C > 0$   
 739 for all  $x \geq 0$ .  $\square$

## 740 F Examples of lazy regions

### 741 F.1 Balanced binary classification

742 We describe the data generation in Section 3.3. The label is uniformly  $\pm 1$ , that is  $\mathbb{P}(y_i = +1) =$   
 743  $\mathbb{P}(y_i = -1) = 0.5$ . We have 10000 positive and negative samples  $x_i \sim \mathcal{N}(y_i, 1)$ . We consider a  
 744 logistic regression model  $\mathbb{P}(Y = y|x) = \mathbb{I}(y = 1) \cdot \text{Sigmoid}(x + \theta) + \mathbb{I}(y = -1) \cdot (1 - \text{Sigmoid}(x +$   
 745  $\theta)) = \frac{1}{1 + e^{-y(\theta + x)}}$ , where  $\theta \in \mathbb{R}$  is the intercept. The gradient with respect to this only trainable  
 746 parameter is  $\frac{\partial \mathcal{L}_i}{\partial \theta} = -y \left(1 - \frac{1}{1 + e^{-y(\theta + x)}}\right)$ . We set the clipping threshold  $R = 0.01$  and the stability  
 747 constant  $\gamma = 0.01$ .

### 748 F.2 Mean estimation on Gaussian mixture data

749 We also observe the lazy region issue in the mean estimation problem  $\min_{\theta} \frac{1}{2} \|\theta - x_i\|^2$ . Here  
 750  $\mathbb{P}(x_i \sim \mathcal{N}(4, 1)) = \mathbb{P}(x_i \sim \mathcal{N}(4, 1)) = 0.5$ . We have 10000 samples from each Gaussian  
 751 distribution. The regular minimum is clearly  $\sum_i x_i \rightarrow 0$ , where the regular gradient and AUTO-S  
 752 clipped gradient vanish. Yet both AUTO-V and Abadi's clipping lose motivation to update the mean  
 753 estimator on the interval  $(-1, 1)$ . We set the clipping threshold  $R = 0.01$  and the stability constant  
 754  $\gamma = 0.1$ .

## 755 G Experiments settings

### 756 G.1 Image classification settings

757 We give the experiments settings for computer vision tasks in Table 1.

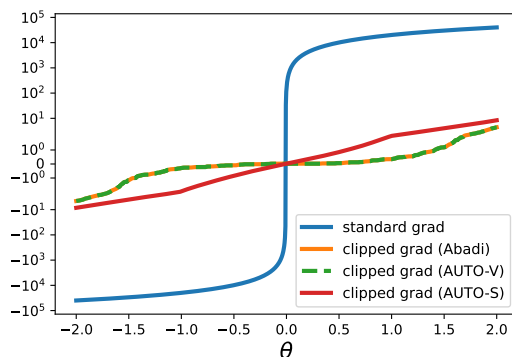

Figure 11: Scalar gradient  $\frac{\partial \mathcal{L}}{\partial \theta}$  at each  $\theta$ .

- 758 • **MNIST**: We use the network architecture from [49, 60, 57], with 40 epochs, 512 batch size,  
 759 0.5 learning rate (or 0.005 non-DP learning rate), 0.1 clipping threshold, DP-SGD with 0.9  
 760 momentum, and without pretraining. This setting is the same as [60].
- 761 • **FashionMNIST**: We use the same network architecture as MNIST, with 40 epochs, 2048 batch  
 762 size, 4 learning rate (or 0.04 non-DP learning rate), DP-SGD with 0.9 momentum, and without  
 763 pretraining. This setting is the same as [60].
- 764 • **CIFAR10 pretrained**: We use the SimCLR model from [12]<sup>8</sup>, with 50 epochs, 1024 batch size,  
 765 4 learning rate (or 0.04 non-DP learning rate), 0.1 clipping threshold, and DP-SGD with 0.9  
 766 momentum. The SimCLR model is pretrained on unlabelled ImageNet dataset. After pretraining,  
 767 we obtain a feature of dimension 4096 on which a linear classifier is trained privately. This setting  
 768 is the same as [60].
- 769 • **ImageNette**: We use the ResNet9 (2.5 million parameters) with Mish activation function [46].  
 770 We set 50 epochs, 1000 batch size, 0.0005 learning rate (or 0.000005 non-DP learning rate), 1.5  
 771 clipping threshold, and use DP-NAdam, without pretraining. This setting is the same as [32]  
 772 except we did not apply the learning rate decaying scheduler.
- 773 • **CelebA (Smiling and Male and Multi-label)** We use the same ResNet9 as above, with 10 epochs,  
 774 500 batch size, 0.001 DP learning rate (or 0.00001 non-DP learning rate), 0.1 clipping threshold,  
 775 and use DP-Adam, without pretraining. We use the labels ‘Smiling’ and ‘Male’ for two binary  
 776 classification tasks, with cross-entropy loss. For the multi-label task uses a scalar loss by summing  
 777 up the 40 binary cross-entropy losses from each label.

778 We refer the code for MNIST, FashionMNIST, CIFAR10, CIFAR10 pretrained to [https://](https://github.com/ftramer/Handcrafted-DP)  
 779 [github.com/ftramer/Handcrafted-DP](https://github.com/ftramer/Handcrafted-DP) by [60]. ResNet9 can be found in [https://github.](https://github.com/cbenitez81/Resnet9)  
 780 [com/cbenitez81/Resnet9](https://github.com/cbenitez81/Resnet9).

781 Throughout all experiments, we do not apply tricks such as random data augmentation (single or  
 782 multiple times [14]), weight standardization [54], or parameter averaging [53].

## 783 G.2 Sentence classification settings

784 We experiment on five datasets in Table 2 and Table 3.

- 785 • **MNLI(m)** MNLI-matched, the matched validation and test splits from Multi-Genre Natural  
 786 Language Inference Corpus.
- 787 • **MNLI(mm)** MNLI-mismatched, the matched validation and test splits from Multi-Genre Natural  
 788 Language Inference Corpus.
- 789 • **QQP** The Quora Question Pairs2 dataset.
- 790 • **QNLI** The Stanford Question Answering dataset.
- 791 • **SST2** The Stanford Sentiment Treebank dataset.

<sup>8</sup>See implementation in <https://github.com/google-research/simclr>.

792 The datasets are processed and loaded from Huggingface [35], as described in [https://](https://huggingface.co/datasets/glue)  
 793 [huggingface.co/datasets/glue](https://huggingface.co/datasets/glue). We follow the same setup as [68] and [37]. We refer the  
 794 interested readers to [37, Appendix G,H,I,K,N] for more details.

795 We emphasize that our automatic clipping uses exactly the same hyperparameters as the Abadi’s  
 clipping in [37], which is released in their Private-Transformers library<sup>9</sup>.

| Dataset                | MNLI(m/mm) | QQP  | QNLI | SST2 |
|------------------------|------------|------|------|------|
| Epoch                  | 18         | 18   | 6    | 3    |
| Batch size             | 6000       | 6000 | 2000 | 1000 |
| clipping threshold $R$ | 0.1        | 0.1  | 0.1  | 0.1  |
| DP learning rate       | 5e-4       | 5e-4 | 5e-4 | 5e-4 |
| non-DP learning rate   | 5e-5       | 5e-5 | 5e-5 | 5e-5 |
| learning rate decay    | Yes        | Yes  | Yes  | Yes  |
| AdamW weight decay     | 0          | 0    | 0    | 0    |
| Max sequence length    | 256        | 256  | 256  | 256  |

Table 5: Hyperparameters of automatic clipping and Abadi’s clipping, for sentence classification in Table 2 and Table 3, using either RoBERTa base or large.

796

### 797 G.3 Table-to-text generation settings

798 We experiment multiple GPT2 models on E2E dataset from Huggingface [35] in Table 4. We follow  
 799 the same setup as [37], and our automatic clipping uses exactly the same hyperparameters as the  
 800 Abadi’s clipping in [37], which is released in their Private-Transformer library<sup>10</sup>.

| Model                  | GPT2 | GPT2 medium | GPT2 large |
|------------------------|------|-------------|------------|
| Epoch                  | 10   | 10          | 10         |
| Batch size             | 1024 | 1024        | 1024       |
| clipping threshold $R$ | 0.1  | 0.1         | 0.1        |
| DP learning rate       | 2e-3 | 2e-3        | 2e-3       |
| non-DP learning rate   | 2e-4 | 1e-4        | 1e-4       |
| learning rate decay    | No   | No          | No         |
| AdamW weight decay     | 0.01 | 0.01        | 0.01       |
| Max sequence length    | 100  | 100         | 100        |

Table 6: Hyperparameters of automatic clipping and Abadi’s clipping, for the E2E generation task in Table 4.

## 801 H Figure zoo

### 802 H.1 Frequency of clipping

803 We show that in all sentence classification tasks, Abadi’s clipping happens on a large proportion of  
 804 per-sample gradients. This supports the similarity between Abadi’s clipping and AUTO-V in (3.1).

805 We note that for GPT2, GPT2 medium and GPT2 large, empirically in all iterations 100% of the  
 806 per-sample gradients are clipped by the Abadi’s clipping, making the performance of Abadi’s clipping  
 807 equivalent to AUTO-V clipping, as shown in Table 4.

### 808 H.2 Stability constant helps AUTO clipping reduce gradient norm

809 To corroborate our claim in Theorem 6, that the stability  $\gamma$  reduces the gradient norm, we plot the  
 810 actual gradient norm by iteration.

<sup>9</sup>See [https://github.com/lxuechen/private-transformers/blob/main/examples/classification/run\\_wrapper.py](https://github.com/lxuechen/private-transformers/blob/main/examples/classification/run_wrapper.py)

<sup>10</sup>See <https://github.com/lxuechen/private-transformers/blob/main/examples/table2text/run.sh>

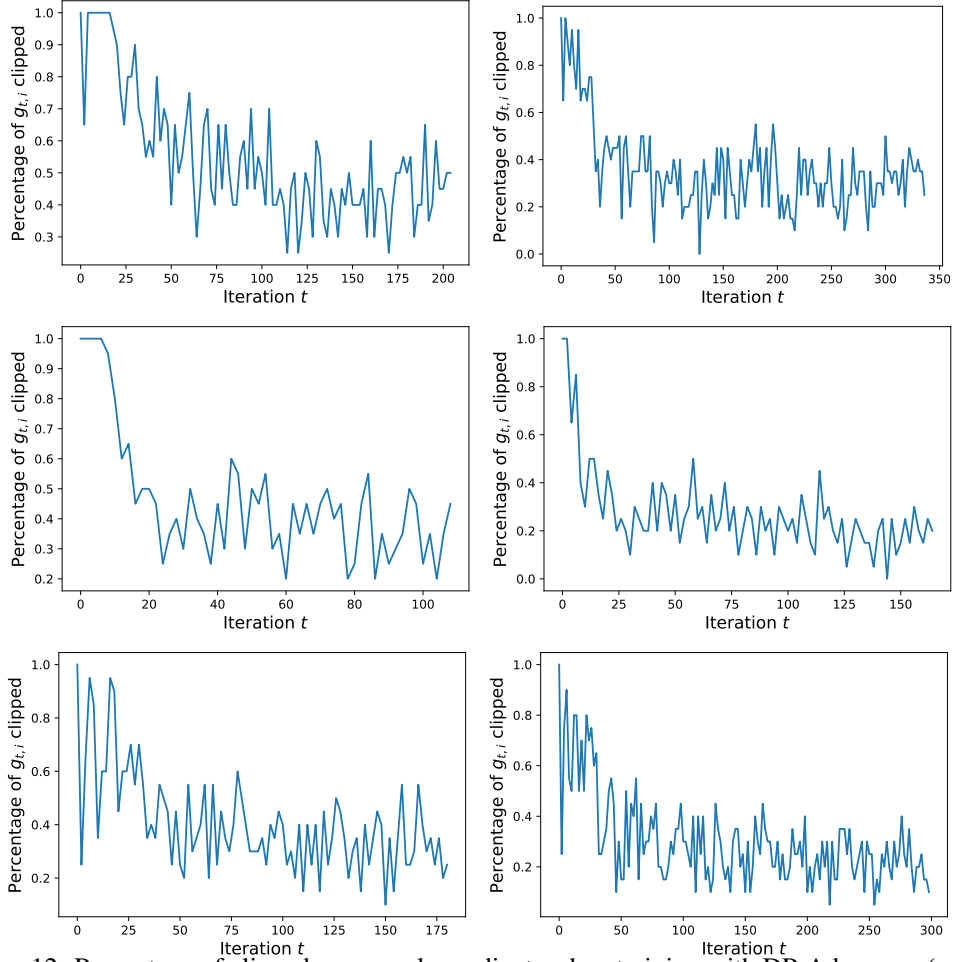

Figure 12: Percentage of clipped per-sample gradients when training with DP-Adam<sub>Abadi</sub> ( $\epsilon = 3$ ), as in Section 6.2. Left panel is RoBERTa-base and right panel is RoBERTa-large. Top row: MNLI. Middle row: QNLI. Bottom row: QQP.

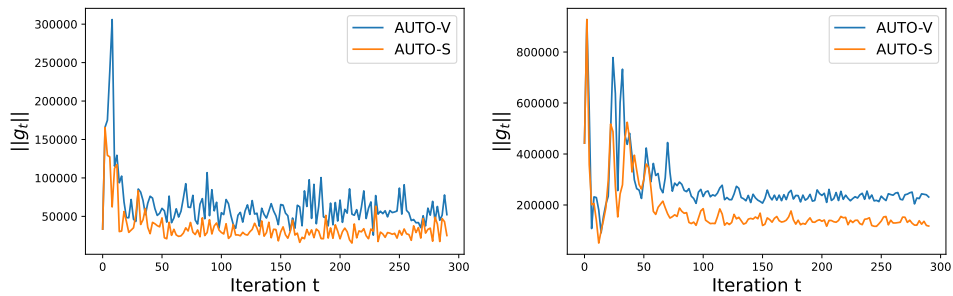

Figure 13: Gradient norm by different automatic clipping methods, on SST2 (left) and MNLI (right), trained with RoBERTa-base.

### 811 H.3 Choice of stability constant is robust

812 We claim in Theorem 6 that, as long as  $\gamma > 0$  in our automatic clipping, the asymptotic convergence  
 813 rate of gradient norm is the same as that by standard non-private SGD. We plot the ablation study  
 814 of learning rate and the stability constant  $\gamma$  to show that it is easy to set  $\gamma$ : in Table 2 and Table 3,  
 815 we adopt learning rate 0.0005, under which a wide range of  $0.0001 < \gamma < 1$  gives similar accuracy.  
 816 Note that the largest good  $\gamma$  is 1000 times bigger than the smallest good  $\gamma$ .



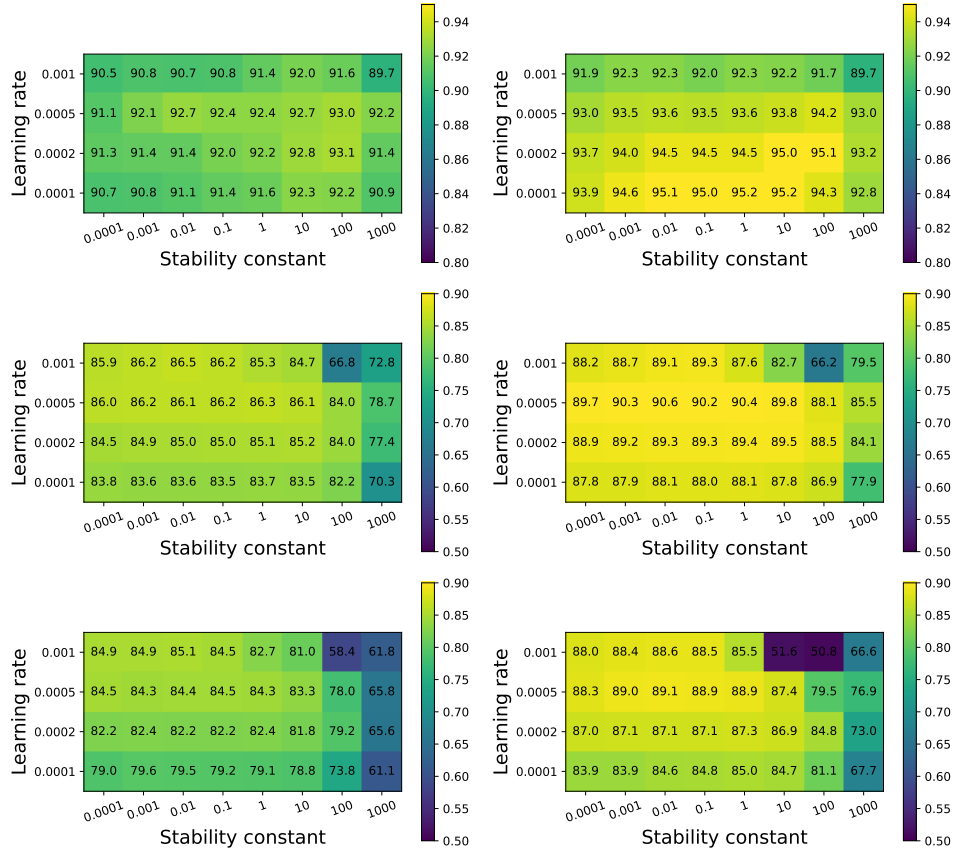

Figure 14: Test accuracy by different stability constant  $\gamma$  and learning rate  $\eta$  in automatic clipping ( $\epsilon = 3$ ). Upper row: SST2 for full 3 epochs. Middle row: QNLI for full 6 epochs. Lower row: QNLI for one epoch. Trained with RoBERTa-base (left) and RoBERTa-large (right).

817 **H.4 Automatic clipping avoids ablation study**

818 We plot the ablation study of learning rate and clipping threshold in Abadi’s clipping below. This  
 819 demonstrates that, AUTO-S clipping only requires 1D grid search to tune the learning rate, avoiding  
 820 the expensive 2D grid search that is unfortunately necessary for the Abadi’s clipping. Hence our  
 automatic clipping can save the tuning effort substantially.

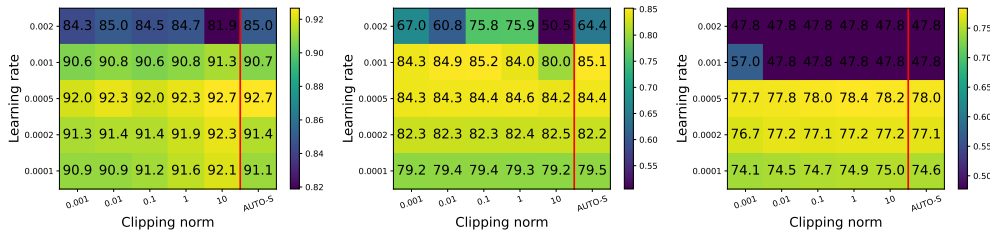

Figure 15: Test accuracy by different clipping threshold  $R$  in  $DP\text{-}Adam_{Abadi}$  and learning rate  $\eta$ , on SST2 (left, 3 epochs) / QNLI (middle, 1 epoch) / MNLI (right, 1 epoch),  $\epsilon = 3$ , trained with RoBERTa-base.

822 **I Full table of GPT2 generation task on E2E dataset**

823 This is the extended version of Table 4 on E2E dataset. The performance measures are BLEU [50],  
 824 ROUGE-L [38], NIST [56], METEOR [4], and CIDEr [62] scores. Here  $\epsilon$  is accounted by RDP [45],  
 825 where  $\epsilon = 3$  corresponds to 2.68 if accounted by Gaussian DP [16, 7] or to 2.75 if accounted by  
 826 numerical composition [27], and  $\epsilon = 8$  corresponds to 6.77 if accounted by Gaussian DP or to 7.27 if  
 827 accounted by numerical composition.

| Metric  | DP guaranteee  | GPT2 large    | GPT2 medium   | GPT2          |               |               |               |        |        |        |         |
|---------|----------------|---------------|---------------|---------------|---------------|---------------|---------------|--------|--------|--------|---------|
|         |                | full          | full          | full          | full          | full          | LoRA          | RGP    | prefix | top2   | retrain |
|         |                | AUTO-S        | AUTO-S        | AUTO-S        | AUTO-V        | [37]          | [29]          | [68]   | [36]   | [37]   | [37]    |
| BLEU    | $\epsilon = 3$ | <b>64.180</b> | <b>63.850</b> | <b>61.340</b> | <b>61.519</b> | <b>61.519</b> | 58.153        | 58.482 | 47.772 | 25.920 | 15.457  |
|         | $\epsilon = 8$ | <b>64.640</b> | <b>64.220</b> | <b>63.600</b> | 63.189        | 63.189        | <b>63.389</b> | 58.455 | 49.263 | 26.885 | 24.247  |
|         | non-DP         | 66.840        | 68.500        | 69.463        | 69.463        | 69.463        | 69.682        | 68.328 | 68.845 | 65.752 | 65.731  |
| ROUGE-L | $\epsilon = 3$ | <b>67.857</b> | <b>67.071</b> | <b>65.872</b> | 65.670        | 65.670        | <b>65.773</b> | 65.560 | 58.964 | 44.536 | 35.240  |
|         | $\epsilon = 8$ | <b>68.968</b> | <b>67.533</b> | <b>67.073</b> | 66.429        | 66.429        | <b>67.525</b> | 65.030 | 60.730 | 46.421 | 39.951  |
|         | non-DP         | 70.384        | 71.458        | 71.359        | 71.359        | 71.359        | 71.709        | 68.844 | 70.805 | 68.704 | 68.751  |
| NIST    | $\epsilon = 3$ | <b>7.937</b>  | <b>7.106</b>  | <b>7.071</b>  | <b>6.697</b>  | <b>6.697</b>  | 5.463         | 5.775  | 5.249  | 1.510  | 0.376   |
|         | $\epsilon = 8$ | <b>8.301</b>  | <b>8.172</b>  | <b>7.714</b>  | 7.444         | 7.444         | <b>7.449</b>  | 6.276  | 5.525  | 1.547  | 1.01    |
|         | non-DP         | 8.730         | 8.628         | 8.780         | 8.780         | 8.780         | 8.822         | 8.722  | 8.722  | 8.418  | 8.286   |
| METEOR  | $\epsilon = 3$ | <b>0.403</b>  | <b>0.387</b>  | <b>0.387</b>  | <b>0.384</b>  | <b>0.384</b>  | 0.370         | 0.331  | 0.363  | 0.197  | 0.113   |
|         | $\epsilon = 8$ | <b>0.420</b>  | <b>0.418</b>  | <b>0.404</b>  | 0.400         | 0.400         | <b>0.407</b>  | 0.349  | 0.364  | 0.207  | 0.145   |
|         | non-DP         | 0.460         | 0.449         | 0.461         | 0.461         | 0.461         | 0.463         | 0.456  | 0.445  | 0.443  | 0.429   |
| CIDEr   | $\epsilon = 3$ | <b>2.008</b>  | <b>1.754</b>  | <b>1.801</b>  | <b>1.761</b>  | <b>1.761</b>  | 1.581         | 1.300  | 1.507  | 0.452  | 0.116   |
|         | $\epsilon = 8$ | <b>2.163</b>  | <b>2.081</b>  | <b>1.938</b>  | 1.919         | 1.919         | <b>1.948</b>  | 1.496  | 1.569  | 0.499  | 0.281   |
|         | non-DP         | 2.356         | 2.137         | 2.422         | 2.422         | 2.422         | 2.491         | 2.418  | 2.345  | 2.180  | 2.004   |

Table 7: Test performance on E2E dataset with GPT2. The best two GPT2 models for each row are marked in bold.

828 We observe that GPT2 (163 million parameters), GPT2-medium (406 million), and GPT2-large  
 829 (838 million), Table 4 trained with our automatic clipping consistently perform better in comparison  
 830 to other methods. In some cases, LoRA trained with Abadi’s clipping also demonstrates strong  
 831 performance and it would be interesting to see how LoRA trained with the automatic clipping will  
 832 behave.

833 **J Further experiments on CelebA dataset**

834 In this section, we present a complete summary of accuracy results, with DP constraint or not, for the  
 835 CelebA dataset. We do not apply any data-preprocessing. In the first experiment, we apply a single  
 836 ResNet on the 40 labels as the multi-task/multi-label learning. In the second experiment, we apply  
 837 one ResNet on one label. As expected, our automatic DP optimizers have comparable test accuracy  
 838 to the Abadi’s DP optimizers, but we do not need to tune the clipping threshold for each individual  
 839 task/label. We also notice that, learning different labels separately gives better accuracy than learning  
 840 all labels together, though at the cost of heavier computational burden.

841 **J.1 Multi-label classification**

842 We apply ResNet9 as in Appendix G.1 on the multi-label classification task. I.e. the output layer has  
 843 40 neurons, each corresponding to one sigmoid cross-entropy loss, that are summed to a single loss  
 844 and all labels are learnt jointly.

| Index | Attributes          | Abadi's<br>$\epsilon = 3$ | AUTO-S<br>$\epsilon = 3$ | Abadi's<br>$\epsilon = 8$ | AUTO-S<br>$\epsilon = 8$ | non-DP<br>$\epsilon = \infty$ |
|-------|---------------------|---------------------------|--------------------------|---------------------------|--------------------------|-------------------------------|
| 0     | 5 o Clock Shadow    | 90.64                     | 90.99↑                   | 90.81                     | 91.28↑                   | 93.33                         |
| 1     | Arched Eyebrows     | 75.15                     | 76.31↑                   | 76.84                     | 77.11↑                   | 81.52                         |
| 2     | Attractive          | 75.85                     | 76.10↑                   | 77.50                     | 77.74↑                   | 81.15                         |
| 3     | Bags Under Eyes     | 80.75                     | 81.12↑                   | 82.15                     | 82.13↓                   | 84.81                         |
| 4     | Bald                | 97.84                     | 97.87↑                   | 98.04                     | 97.98↓                   | 98.58                         |
| 5     | Bangs               | 92.71                     | 92.68↓                   | 93.46                     | 93.55↑                   | 95.50                         |
| 6     | Big Lips            | 67.51                     | 67.78↑                   | 68.34                     | 68.44↑                   | 71.33                         |
| 7     | Big Nose            | 78.01                     | 80.23↑                   | 76.69                     | 80.59↑                   | 83.54                         |
| 8     | Black Hair          | 81.92                     | 80.95↓                   | 83.33                     | 83.28↓                   | 88.55                         |
| 9     | Blond Hair          | 92.25                     | 92.38↑                   | 93.52                     | 93.09↓                   | 95.49                         |
| 10    | Blurry              | 94.91                     | 94.82↓                   | 95.08                     | 94.90↓                   | 95.78                         |
| 11    | Brown Hair          | 80.13                     | 82.50↑                   | 83.74                     | 83.89↑                   | 87.79                         |
| 12    | Bushy Eyebrows      | 88.06                     | 88.23↑                   | 89.72                     | 88.80↓                   | 92.19                         |
| 13    | Chubby              | 94.72                     | 94.54↓                   | 94.54                     | 94.50↓                   | 95.56                         |
| 14    | Double Chin         | 95.19                     | 95.49↑                   | 95.50                     | 95.51↑                   | 96.09                         |
| 15    | Eyeglasses          | 97.06                     | 97.64↑                   | 98.32                     | 98.06↓                   | 99.39                         |
| 16    | Goatee              | 95.68                     | 95.45↓                   | 95.84                     | 95.87↑                   | 97.06                         |
| 17    | Gray Hair           | 96.77                     | 96.79↑                   | 97.02                     | 97.03↑                   | 98.06                         |
| 18    | Heavy Makeup        | 84.96                     | 85.70↑                   | 87.58                     | 87.29↓                   | 90.76                         |
| 19    | High Cheekbones     | 81.46                     | 81.42↓                   | 82.62                     | 82.72↑                   | 86.62                         |
| 20    | Male                | 92.05                     | 92.17↑                   | 93.32                     | 93.17↓                   | 97.46                         |
| 21    | Mouth Slightly Open | 86.20                     | 86.32↑                   | 87.84                     | 88.48↑                   | 93.07                         |
| 22    | Mustache            | 96.05                     | 95.96↓                   | 96.08                     | 95.99↓                   | 96.74                         |
| 23    | Narrow Eyes         | 84.90                     | 84.78↓                   | 85.14                     | 85.18↑                   | 86.98                         |
| 24    | No Beard            | 91.55                     | 91.67↑                   | 92.29                     | 92.45↑                   | 95.18                         |
| 25    | Oval Face           | 71.26                     | 71.42↑                   | 71.98                     | 71.25↓                   | 74.62                         |
| 26    | Pale Skin           | 96.09                     | 96.04↓                   | 96.15                     | 96.17↑                   | 96.93                         |
| 27    | Pointy Nose         | 70.34                     | 72.11↑                   | 72.23                     | 73.01↑                   | 75.68                         |
| 28    | Receding Hairline   | 91.53                     | 91.37↓                   | 91.75                     | 91.74↓                   | 92.87                         |
| 29    | Rosy Cheeks         | 93.26                     | 93.02↓                   | 93.56                     | 93.35↓                   | 94.86                         |
| 30    | Sideburns           | 96.16                     | 96.09↓                   | 96.27                     | 96.46↑                   | 97.44                         |
| 31    | Smiling             | 86.39                     | 87.08↑                   | 88.87                     | 88.63↓                   | 92.25                         |
| 32    | Straight Hair       | 76.20                     | 77.95↑                   | 78.78                     | 78.52↓                   | 80.66                         |
| 33    | Wavy Hair           | 70.30                     | 71.79↑                   | 73.58                     | 73.19↓                   | 79.15                         |
| 34    | Wearing Earrings    | 80.53                     | 81.52↑                   | 82.29                     | 82.20↓                   | 87.56                         |
| 35    | Wearing Hat         | 96.99                     | 96.83↓                   | 97.46                     | 97.31↓                   | 98.68                         |
| 36    | Wearing Lipstick    | 88.95                     | 88.04↓                   | 89.87                     | 90.72↑                   | 93.49                         |
| 37    | Wearing Necklace    | 84.59                     | 85.83↑                   | 85.93                     | 85.42↓                   | 86.61                         |
| 38    | Wearing Necktie     | 93.91                     | 93.91–                   | 94.43                     | 94.08↓                   | 96.30                         |
| 39    | Young               | 81.35                     | 81.21↓                   | 82.18                     | 82.52↑                   | 87.18                         |

Table 8: Accuracy on CelebA dataset with settings in Appendix G.1 from one run. The green arrow indicates AUTO-S is better than Abadi's clipping under the same  $\epsilon$ ; the red arrow indicates otherwise; the black bar indicates the same accuracy.

845 **J.2 Multiple binary classification**

846 For the second experiment, we apply ResNet9 on each label as a binary classification task. I.e. the output layer has 1 neuron and we run 40 different models for all labels separately.

| Index | Attributes          | Abadi's<br>Single<br>$\epsilon = 8$ | AUTO-S<br>Single<br>$\epsilon = 8$ | Abadi's<br>Multi<br>$\epsilon = 8$ | AUTO-S<br>Multi<br>$\epsilon = 8$ | non-DP<br>Multi<br>$\epsilon = \infty$ |
|-------|---------------------|-------------------------------------|------------------------------------|------------------------------------|-----------------------------------|----------------------------------------|
| 0     | 5 o Clock Shadow    | 92.15                               | 92.29↑                             | 90.81                              | 91.28↑                            | 93.33                                  |
| 1     | Arched Eyebrows     | 81.18                               | 80.19↓                             | 76.84                              | 77.11↑                            | 81.52                                  |
| 2     | Attractive          | 79.31                               | 79.79↑                             | 77.50                              | 77.74↑                            | 81.15                                  |
| 3     | Bags Under Eyes     | 83.52                               | 83.48↓                             | 82.15                              | 82.13↓                            | 84.81                                  |
| 4     | Bald                | 97.89                               | 97.88↓                             | 98.04                              | 97.98↓                            | 98.58                                  |
| 5     | Bangs               | 94.52                               | 94.83↑                             | 93.46                              | 93.55↑                            | 95.50                                  |
| 6     | Big Lips            | 67.32                               | 67.53↑                             | 68.34                              | 68.44↑                            | 71.33                                  |
| 7     | Big Nose            | 82.31                               | 82.36↑                             | 76.69                              | 80.59↑                            | 83.54                                  |
| 8     | Black Hair          | 87.08                               | 86.93↓                             | 83.33                              | 83.28↓                            | 88.55                                  |
| 9     | Blond Hair          | 94.29                               | 94.73↑                             | 93.52                              | 93.09↓                            | 95.49                                  |
| 10    | Blurry              | 94.95                               | 95.20↑                             | 95.08                              | 94.90↓                            | 95.78                                  |
| 11    | Brown Hair          | 87.41                               | 87.19↓                             | 83.74                              | 83.89↑                            | 87.79                                  |
| 12    | Bushy Eyebrows      | 91.23                               | 91.43↑                             | 89.72                              | 88.80↓                            | 92.19                                  |
| 13    | Chubby              | 94.70                               | 94.70–                             | 94.54                              | 94.50↓                            | 95.56                                  |
| 14    | Double Chin         | 95.43                               | 95.43–                             | 95.50                              | 95.51↑                            | 96.09                                  |
| 15    | Eyeglasses          | 98.88                               | 99.14↑                             | 98.32                              | 98.06↓                            | 99.39                                  |
| 16    | Goatee              | 96.12                               | 96.07↓                             | 95.84                              | 95.87↑                            | 97.06                                  |
| 17    | Gray Hair           | 97.48                               | 97.34↓                             | 97.02                              | 97.03↑                            | 98.06                                  |
| 18    | Heavy Makeup        | 88.85                               | 88.72↓                             | 87.58                              | 87.29↓                            | 90.76                                  |
| 19    | High Cheekbones     | 85.66                               | 85.45↓                             | 82.62                              | 82.72↑                            | 86.62                                  |
| 20    | Male                | 95.42                               | 95.70↑                             | 95.53                              | 93.17↓                            | 97.46                                  |
| 21    | Mouth Slightly Open | 92.67                               | 92.74↑                             | 87.84                              | 88.48↑                            | 93.07                                  |
| 22    | Mustache            | 96.13                               | 96.13–                             | 96.08                              | 95.99↓                            | 96.74                                  |
| 23    | Narrow Eyes         | 85.13                               | 85.13–                             | 85.14                              | 85.18↑                            | 86.98                                  |
| 24    | No Beard            | 94.26                               | 94.58↑                             | 92.29                              | 92.45↑                            | 95.18                                  |
| 25    | Oval Face           | 70.77                               | 73.05↑                             | 71.98                              | 71.25↓                            | 74.62                                  |
| 26    | Pale Skin           | 96.38                               | 96.34↓                             | 96.15                              | 96.17↑                            | 96.93                                  |
| 27    | Pointy Nose         | 71.48                               | 73.37↑                             | 72.23                              | 73.01↑                            | 75.68                                  |
| 28    | Receding Hairline   | 91.51                               | 91.51–                             | 91.75                              | 91.74↓                            | 92.87                                  |
| 29    | Rosy Cheeks         | 93.26                               | 93.35↑                             | 93.56                              | 93.35↓                            | 94.86                                  |
| 30    | Sideburns           | 96.46                               | 96.34↓                             | 96.27                              | 96.46↑                            | 97.44                                  |
| 31    | Smiling             | 90.82                               | 90.87↑                             | 88.87                              | 88.63↓                            | 92.25                                  |
| 32    | Straight Hair       | 79.01                               | 79.01–                             | 78.78                              | 78.52↓                            | 80.66                                  |
| 33    | Wavy Hair           | 77.55                               | 78.83↑                             | 73.58                              | 73.19↓                            | 79.15                                  |
| 34    | Wearing Earrings    | 87.33                               | 87.50↑                             | 82.29                              | 82.20↓                            | 87.56                                  |
| 35    | Wearing Hat         | 98.04                               | 98.11↑                             | 97.46                              | 97.31↓                            | 98.68                                  |
| 36    | Wearing Lipstick    | 92.05                               | 90.46↓                             | 89.87                              | 90.72↑                            | 93.49                                  |
| 37    | Wearing Necklace    | 86.21                               | 86.21–                             | 85.93                              | 85.42↓                            | 86.61                                  |
| 38    | Wearing Necktie     | 95.85                               | 95.94↑                             | 94.43                              | 94.08↓                            | 96.30                                  |
| 39    | Young               | 85.19                               | 84.12↓                             | 82.18                              | 82.52↑                            | 87.18                                  |

Table 9: Accuracy on CelebA dataset with settings in Appendix G.1 from one run. ‘Single’ means each attribute is learned separately as a binary classification task. ‘Multi’ means all attributes are learned jointly as a multi-label classification task. The green arrow indicates AUTO-S is better than Abadi’s clipping under the same  $\epsilon$  and the same task; the red arrow indicates otherwise; the black bar indicates the same accuracy.

## 848 **K Code implementation of automatic clipping**

849 Changing Abadi’s clipping to automatic clipping is easy in available codebases. One can set the  
850 clipping  $R = 1$  or any other constant, as explained in Theorem 1 and Theorem 2.

### 851 **K.1 Opacus**

852 For Opacus [67] version 1.1.2 (latest), we can implement the all-layer automatic clipping by changing  
853 Line 399-401 in [https://github.com/pytorch/opacus/blob/main/opacus/optimizers/](https://github.com/pytorch/opacus/blob/main/opacus/optimizers/optimizer.py)  
854 [optimizer.py](https://github.com/pytorch/opacus/blob/main/opacus/optimizers/optimizer.py) to

```
855 per_sample_clip_factor = self.max_grad_norm / (per_sample_norms + 0.01)
```

856 The per-layer automatic clipping requires changing Line 61-63 in [https://github.com/pytorch/](https://github.com/pytorch/opacus/blob/main/opacus/optimizers/perlayeroptimizer.py)  
857 [opacus/blob/main/opacus/optimizers/perlayeroptimizer.py](https://github.com/pytorch/opacus/blob/main/opacus/optimizers/perlayeroptimizer.py) to

```
858 per_sample_clip_factor =max_grad_norm / (per_sample_norms + 0.01)
```

859 For older version ( $< 1.0$ , e.g. 0.15) of Opacus, we can implement the all-layer automatic clipping  
860 by changing Line 223-225 in [https://github.com/pytorch/opacus/blob/v0.15.0/opacus/](https://github.com/pytorch/opacus/blob/v0.15.0/opacus/opts/opts.py)  
861 [opts/opts.py](https://github.com/pytorch/opacus/blob/v0.15.0/opacus/opts/opts.py) to

```
862 per_sample_clip_factor = self.flat_value / (norms[0] + 0.01)
```

863 or implement the per-layer automatic clipping by changing Line 301-302 in [https://github.com/](https://github.com/pytorch/opacus/blob/main/opacus/optimizers/perlayeroptimizer.py)  
864 [pytorch/opacus/blob/main/opacus/optimizers/perlayeroptimizer.py](https://github.com/pytorch/opacus/blob/main/opacus/optimizers/perlayeroptimizer.py) to

```
865 per_sample_clip_factor = threshold / (norm + 0.01)  
866 clipping_factor.append(per_sample_clip_factor)
```

### 867 **K.2 ObjAX**

868 For ObjAX version 1.6.0 (latest), we can implement the automatic clipping in [https://github.](https://github.com/google/objax/blob/master/objax/privacy/dpsgd/gradient.py)  
869 [com/google/objax/blob/master/objax/privacy/dpsgd/gradient.py](https://github.com/google/objax/blob/master/objax/privacy/dpsgd/gradient.py) by changing Line 92  
870 to

```
871 idivisor = self.l2_norm_clip / (total_grad_norm+0.01)
```

872 and changing Line 145 to

```
873 idivisor = self.l2_norm_clip/(grad_norms+0.01)
```

### 874 **K.3 Private-transformers**

875 To reproduce our experiments for sentence classification and table-to-text genera-  
876 tion, we modify the ‘private-transformers’ codebase of [37]. The modification is  
877 in [https://github.com/lxuechen/private-transformers/blob/main/private\\_](https://github.com/lxuechen/private-transformers/blob/main/private_transformers/privacy_utils/privacy_engine.py)  
878 [transformers/privacy\\_utils/privacy\\_engine.py](https://github.com/lxuechen/private-transformers/blob/main/private_transformers/privacy_utils/privacy_engine.py), by changing Line 349 to

```
879 return self.max_grad_norm / (norm_sample + 0.01)
```

880 and Line 510-512 to

```
881 coef_sample = self.max_grad_norm * scale / (norm_sample + 0.01)
```
